# Supplementary material for: Resin supported acyl carrier protein labeling strategies
Source: Royal Society of Chemistry journal article supplement (doi:10.1039/c3ra47847e), 2014-01-01
Supplement: c3ra47847e.pdf [file c3ra47847e.pdf]

# Resin Supported Acyl Carrier Protein Labeling Strategies

## (Supplementary Information)

*Michael Rothmann, Nicolas M. Kosa, and Michael D. Burkart*

Received (in XXX, XXX) Xth XXXXXXXXXX 20XX, Accepted Xth XXXXXXXXXX †Department of Chemistry and Biochemistry, University of California, San Diego, 9500 Gilman Drive, La Jolla, CA 92093-0358, United States

Correspondence should be directed to [mburkart@ucsd.edu](mailto:mburkart@ucsd.edu)

| Contents:                  | Page |
|----------------------------|------|
| Gels for figures 2 and 3   | S2   |
| Supplementary Sfp Kinetics | S3   |

Full gels from Figure 2 and 3.

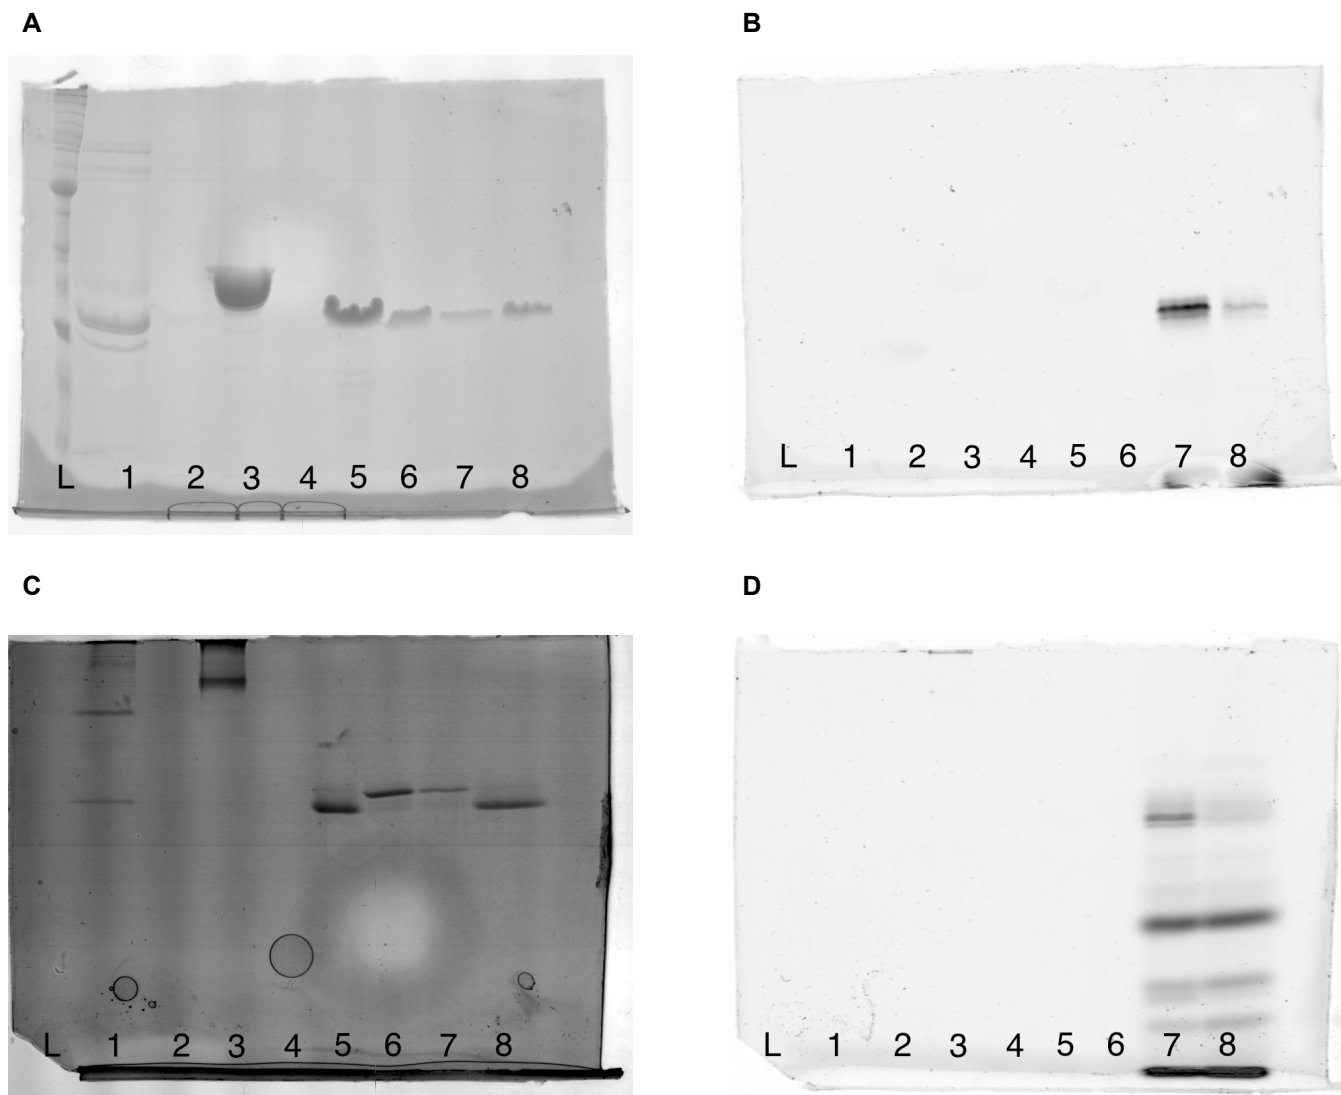

**Figure S1** Full gels of figure 1. **A:** SDS-PAGE, Coomassie stain. **B:** SDS-PAGE, Fluorescence  $\lambda_{532}$ . **C:** Urea-PAGE, Coomassie Stain. **D:** Urea-PAGE, Fluorescence  $\lambda_{532}$ . Lane key for all gels. **L:** Benchmark Ladder. **1:** Soluble AcpH. **2:** Supernatant from AcpH/Affi-gel coupling. **3:** Soluble Sfp. **4:** Supernatant from Sfp/Affi-gel coupling. **5:** Holo-ACP. **6:** (5)+ AcpH resin. **7:** (6) + Sfp resin, rhodamine-CoA. **8:** (5)+ Sfp Resin, rhodamine-CoA.

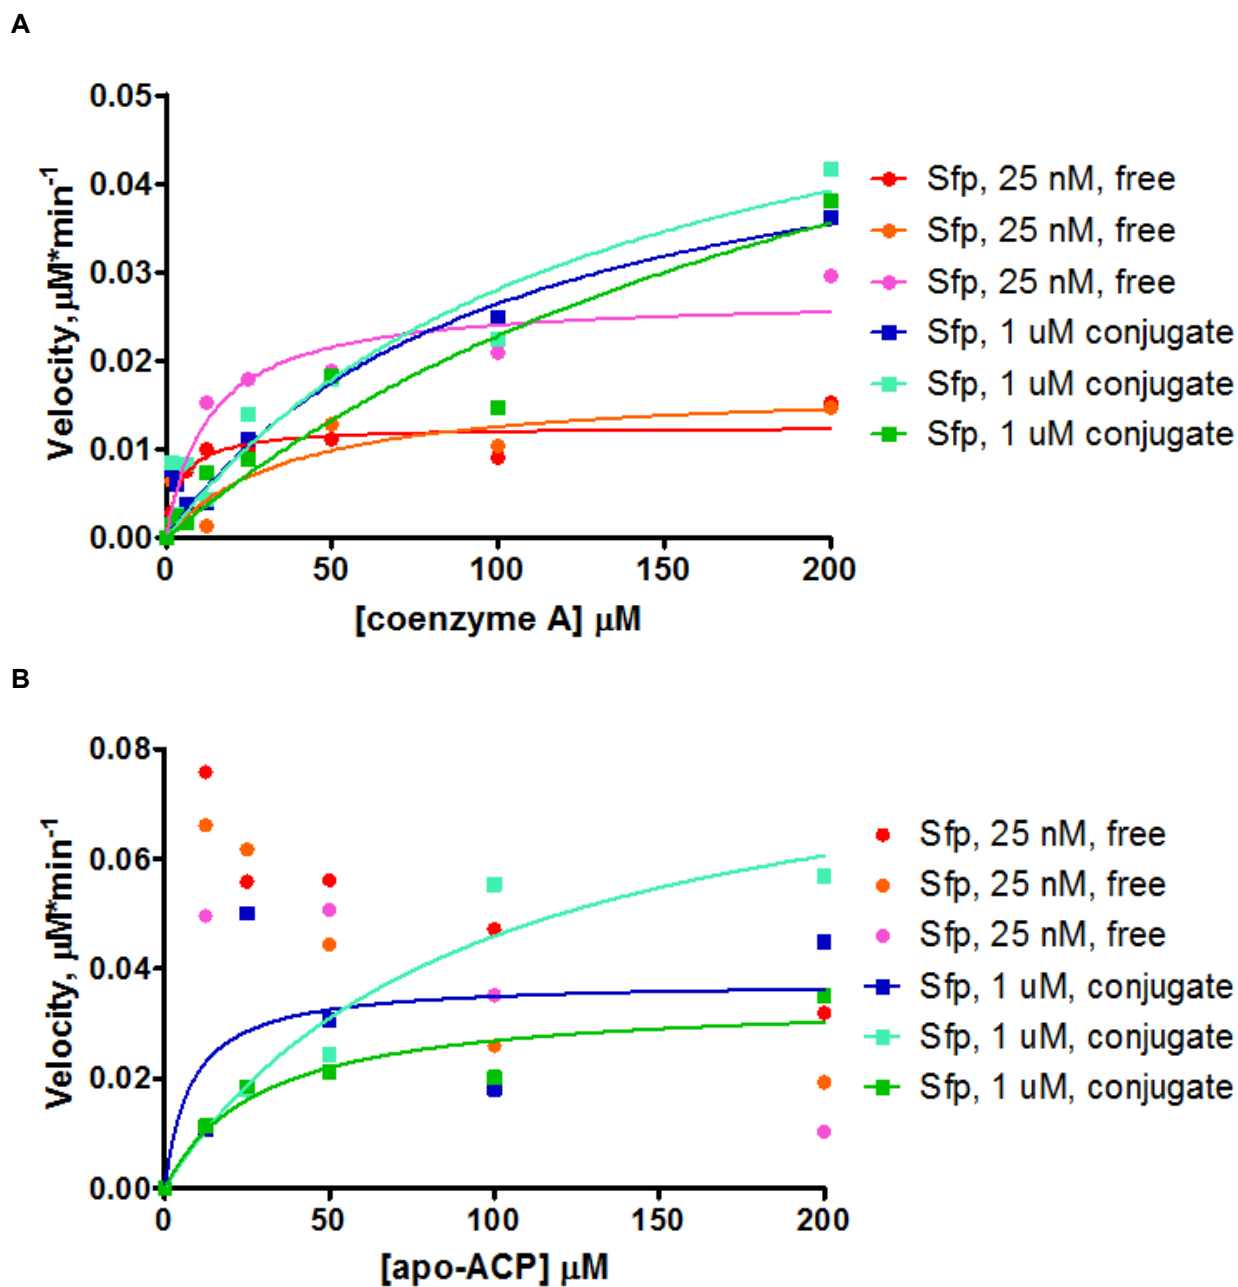

**Figure S2 Supplementary Sfp Kinetics.** Discrete graphs for Sfp/*apo*-ACP (A) and Sfp/CoA (B) depict the deviation of discrete samples..
